# Supplementary material
Source: Elsevier journal article supplement (https://www.sciencedirect.com/science/article/pii/S0213911116301005)
Supplement: mmc1 [file S0213911116301005:mmc1.pdf]

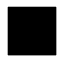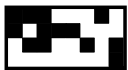

47205

## CUESTIONARIO AS-ASSIR. CASTELLANO

Codigo encuesta

|  |  |  |
|--|--|--|
|  |  |  |
|--|--|--|

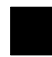

Codigo centro

|  |  |
|--|--|
|  |  |
|--|--|

Fecha de respuesta

|  |  |
|--|--|
|  |  |
|--|--|

/

|  |  |
|--|--|
|  |  |
|--|--|

/

|  |  |  |  |
|--|--|--|--|
|  |  |  |  |
|--|--|--|--|

Esta investigación tiene por finalidad conocer la realidad y las experiencias que han vivido las mujeres que se visitan en nuestros centros sobre su salud sexual y reproductiva.

Sus respuestas sinceras son importantes para que los profesionales sanitarios conozcan mejor algunos problemas de salud de las mujeres, relacionados con la sexualidad, la vida de pareja, el maltrato y los abusos sexuales, que a pesar de ser frecuentes, pueden no recibir la atención adecuada.

Su colaboración posibilitará la elaboración de programas preventivos y la mejora de la calidad asistencial.

La información que nos dé será totalmente anónima y confidencial y por lo tanto, no figurará en su historia clínica.

Si al contestar las preguntas, necesita alguna aclaración puede hablar con la persona que le ha dado el cuestionario.

Le agradecemos su colaboración.

Las preguntas de este cuestionario hacen referencia a su salud sexual y reproductiva y a aspectos personales y sociales de su vida.

Por favor, lea con atención las preguntas y marque la casilla o casillas que crea que responden mejor a su situación. Siempre que sea posible marque solo una opción.

Es importante que responda a todas las preguntas.

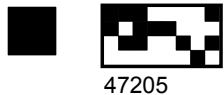

47205

Codigo encuesta

|  |  |  |
|--|--|--|
|  |  |  |
|--|--|--|

1 - ¿Dónde nació?

- ☐ Cataluña
- ☐ España
- ☐ Países de la Comunidad Europea
- ☐ Resto de Europa
- ☐ Magreb y Valle del Nilo
- ☐ Resto de África
- ☐ Centro y Sud-América
- ☐ Asia
- ☐ Otros sitios Especificar \_\_\_\_\_

2 - ¿Qué edad tiene?

|  |  |
|--|--|
|  |  |
|--|--|

años

3 - ¿Cuál es el título académico (estudios) de mayor nivel que ha obtenido?

- ☐ Primaria incompleta
- ☐ Primaria completa: cinco cursos aprobados de EGB
- ☐ Secundaria: graduado escolar, bachillerato elemental, EGB o ESO
- ☐ Bachillerato superior, BUP o COU
- ☐ FP grado medio o FP II grado superior
- ☐ Universitarios

4 - ¿Cuál es su situación laboral?

- ☐ Trabajo asalariado fijo
- ☐ Trabajo asalariado eventual
- ☐ Trabajo a horas / economía sumergida
- ☐ Negocio propio / autónoma
- ☐ Ama de casa
- ☐ Jubilada, pensionista
- ☐ Estudiante
- ☐ Desempleada
- ☐ Otras Especificar \_\_\_\_\_

5 - ¿Cuál es su situación personal actual?

- ☐ Soltera
- ☐ Casada
- ☐ Separada
- ☐ Divorciada
- ☐ Viuda
- ☐ Pareja de hecho
- ☐ Otras Especificar \_\_\_\_\_

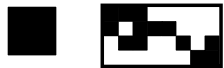

47205

Codigo encuesta

|  |  |  |
|--|--|--|
|  |  |  |
|--|--|--|

6 - ¿Cómo diría usted que es su salud actualmente?

- ☐ Excelente
- ☐ Muy buena
- ☐ Buena
- ☐ Regular
- ☐ Mala
- ☐ Muy mala

7 - ¿Qué edad tenía en su primera relación sexual con penetración?

☐ No he tenido    EN ESTE CASO PASE A LA PREGUNTA 13

|  |  |
|--|--|
|  |  |
|--|--|

 Años

8 - ¿Cómo se sintió en sus primeras relaciones sexuales?

- ☐ Me sentí bien y las decidí libremente
- ☐ Me sentí presionada o coaccionada
- ☐ Me obligaron
- ☐ Otras    Especificar \_\_\_\_\_

9 - En el caso de que tenga hijos, ¿qué edad tenía usted cuando tuvo el primero?

☐ No he tenido hijos

|  |  |
|--|--|
|  |  |
|--|--|

 Años

10 - ¿Ha tenido alguna vez un embarazo no planificado?

- ☐ Sí
- ☐ No

11 - ¿Alguna vez ha tenido que realizar una interrupción voluntaria del embarazo?

- ☐ Nunca
- ☐ 1 vez
- ☐ 2 veces
- ☐ 3 veces
- ☐ 4 o más veces

12 - En el supuesto de que haya contestado afirmativamente a la pregunta anterior, ¿qué edad tenía?

- ☐ 15 años o menos                      (puede marcar más de una casilla si ha tenido más de un aborto)
- ☐ De 16 a 18 años
- ☐ De 19 a 21 años
- ☐ Más de 21 años

13 - ¿Ha tenido una nueva pareja sexual durante el último año?

- ☐ Sí
- ☐ No

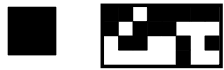

47205

Codigo encuesta

|  |  |  |
|--|--|--|
|  |  |  |
|--|--|--|

14 - ¿Con cuántas personas ha tenido relaciones sexuales el último año?

- ☐ Ninguna
- ☐ 1
- ☐ 2
- ☐ 3
- ☐ 4
- ☐ 5 o más

15 - ¿Con cuántas personas a lo largo de su vida, ha tenido relaciones sexuales aunque haya sido una sola vez?

☐ Nunca he tenido relaciones sexuales

|  |  |
|--|--|
|  |  |
|--|--|

 Personas

16 - ¿Alguna vez le ha dicho el médico que tiene una infección de transmisión sexual como sífilis, gonorrea, herpes genital, verrugas genitales (HPV / condilomas), clamidia, tricomonas, hepatitis B (por transmisión sexual) o VIH-sida (por transmisión sexual)?

- ☐ Sí
- ☐ No
- ☐ No sé

17 - ¿Alguna vez, cree que ha estado en riesgo de contagiarse de una infección de transmisión sexual por no utilizar el preservativo?

- ☐ Nunca
- ☐ 1 vez
- ☐ 2 veces
- ☐ 3 veces
- ☐ 4 veces
- ☐ 5 o más veces

18 - ¿Alguna vez ha tenido relaciones sexuales, bajo los efectos del alcohol o las drogas?

- ☐ No tengo actividad sexual
- ☐ Casi siempre o siempre
- ☐ Muchas veces (más de la mitad de las veces)
- ☐ Algunas veces (la mitad de las veces)
- ☐ Pocas veces (menos de la mitad de las veces)
- ☐ Casi nunca, o nunca

19 - ¿Se siente satisfecha con su vida sexual?

- ☐ Muy satisfecha
- ☐ Satisfecha
- ☐ Ni satisfecha, ni insatisfecha
- ☐ Poco satisfecha
- ☐ Muy insatisfecha

20 - ¿Con qué frecuencia sientes el deseo de mantener alguna actividad sexual?

- ☐ Nunca
- ☐ Menos de una vez al mes
- ☐ Más de una vez al mes
- ☐ Más de una vez per semana
- ☐ Cada día

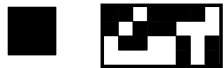

47205

Codigo encuesta

|  |  |  |
|--|--|--|
|  |  |  |
|--|--|--|

SI NO HA TENIDO ACTIVIDAD SEXUAL DURANTE EL ÚLTIMO AÑO, PASE A LA PREGUNTA 25

21 - Durante el último año, ¿ha sentido excitación sexual, cuando ha sido estimulada adecuadamente?

- ☐ Casi siempre o siempre
- ☐ Muchas veces (más de la mitad de las veces)
- ☐ Algunas veces (la mitad de las veces)
- ☐ Pocas veces (menos de la mitad de las veces)
- ☐ Casi nunca
- ☐ Nunca

22 - En el último año, cuando ha tenido estimulación sexual, ¿con qué frecuencia llega al orgasmo?

- ☐ Casi siempre o siempre
- ☐ Muchas veces (más de la mitad de las veces)
- ☐ Algunas veces (la mitad de las veces)
- ☐ Pocas veces (menos de la mitad de las veces)
- ☐ Casi nunca
- ☐ Nunca

23 - En el último año, ¿con qué frecuencia experimentó dolor o molestias durante o después de la relación sexual?

- ☐ Casi siempre o siempre
- ☐ Muchas veces (más de la mitad de las veces)
- ☐ Algunas veces (la mitad de las veces)
- ☐ Pocas veces (menos de la mitad de las veces)
- ☐ Casi nunca
- ☐ Nunca

24 - Durante el último año, ¿ha sentido rechazo o aversión en el momento de tener relaciones sexuales?

- ☐ Casi siempre o siempre
- ☐ Muchas veces (más de la mitad de las veces)
- ☐ Algunas veces (la mitad de las veces)
- ☐ Pocas veces (menos de la mitad de las veces)
- ☐ Casi nunca
- ☐ Nunca

25 - ¿Cómo se siente en la relación afectiva con su pareja actual?

- ☐ No tengo pareja → PASAR A LA PREGUNTA 28
- ☐ Muy satisfecha
- ☐ Satisfecha
- ☐ Ni bien, ni mal
- ☐ Poco satisfecha
- ☐ Muy insatisfecha

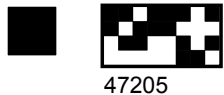

Codigo encuesta

|  |  |  |
|--|--|--|
|  |  |  |
|--|--|--|

26 - ¿Confía usted en su pareja?

- ☐ Siempre
- ☐ Casi siempre
- ☐ A menudo
- ☐ A veces
- ☐ Casi nunca
- ☐ Nunca

27 - ¿Como es la comunicación con su pareja?

- ☐ Muy buena
- ☐ Buena
- ☐ Ni buena ni mala
- ☐ Mala
- ☐ Muy mala

28 - ¿Con cuantas parejas ha convivido a lo largo de su vida?

- ☐ Ninguna
- ☐ 1 pareja
- ☐ De 2 a 4 parejas
- ☐ De 5 a 10 parejas
- ☐ Más de 10 parejas

29 - ¿Ha vivido episodios de maltrato por parte de alguna de sus parejas? (puede marcar más de una respuesta)

- ☐ No he vivido ningún episodio de maltrato
- ☐ Maltrato psíquico
- ☐ Maltrato físico
- ☐ Maltrato sexual
- ☐ Maltrato económico

**LAS PREGUNTAS QUE LE HACEMOS A CONTINUACIÓN HACEN REFERENCIA SÓLO A SITUACIONES QUE LE HAYAN OCURRIDO A LOS 18 AÑOS O ANTES DE LOS 18 AÑOS.**

En el caso que le haya pasado con más de una persona responda en base a la experiencia que considere más significativa en su vida.

47205

Codigo encuesta

30 - Algún familiar, amigo de la familia u otra persona conocida o desconocida, alguna vez, ¿le ha tocado o manipulado su cuerpo, pechos y genitales o ha intentado estimularla sexualmente sin su consentimiento?

☐ No

☐ Sí —————> En caso afirmativo, responda a las preguntas 30.1, 30.2 i 30.3

30.1- ¿Qué relación tenía con esta persona?

☐ Deconocido

☐ Amigos o conocidos

☐ Amigos o conocidos de la familia

☐ Padre

☐ Padrastro o cuidador

☐ Abuelo

☐ Hermano

☐ Hermanastro

☐ Religioso

☐ Pareja

☐ Otros familiares

☐ Otros \_\_\_\_\_

30.2 - ¿Cuánto tiempo duró esta situación?

☐ Una vez

☐ Menos de 1 año

☐ De 1 a 3 años

☐ Más de 3 años

30.3 - ¿Qué edad tenía la primera vez que se encontró en esta situación?

☐ Menos de 13 años

☐ De 13 a 18 años

31 - Algún familiar, amigo de la familia u otra persona conocida o desconocida, alguna vez ¿le ha obligado a tocarle su cuerpo sexualmente?

☐ No

☐ Sí —————> En cas afirmativo, responda a las preguntas 31.1, 31.2 i 31.3

31.1 - ¿Qué relación tenía con esta persona?

☐ Deconocido

☐ Amigos o conocidos

☐ Amigos o conocidos de la familia

☐ Padre

☐ Padrastro o cuidador

☐ Abuelo

☐ Hermano

☐ Hermanastro

☐ Religioso

☐ Pareja

☐ Otros familiares

☐ Otros \_\_\_\_\_

31.2- ¿Cuánto tiempo duró esta situación?

☐ Una vez

☐ Menos de 1 año

☐ De 1 a 3 años

☐ Más de 3 años

31.3 -¿Qué edad tenía la primera vez que se encontró en esta situación?

☐ Menos de 13 años

☐ De 13 a 18 años

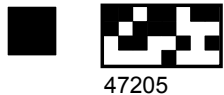

Codigo encuesta

|  |  |  |
|--|--|--|
|  |  |  |
|--|--|--|

32 - Algún familiar, amigo de la familia u otra persona conocida o desconocida, alguna vez, ¿**intentó tener** una relación sexual oral, anal o vaginal con usted, sin su consentimiento?

☐ No

☐ Sí —————> En cas afirmativo, responda a las preguntas 32.1, 32.2 i 32.3

32.1- ¿Qué relación tenía con esta persona?

- ☐ Desconocido
- ☐ Amigo o conocido
- ☐ Amigo o conocido de la familia
- ☐ Padre
- ☐ Padrastro o cuidador
- ☐ Abuelo
- ☐ Hermano
- ☐ Hermanastro
- ☐ Religioso
- ☐ Pareja
- ☐ Otros familiares
- ☐ Otros \_\_\_\_\_

32.2- ¿Cuánto tiempo duró esta situación?

- ☐ Una vez
- ☐ Menos de 1 año
- ☐ De 1 a 3 años
- ☐ Más de 3 años

32.3 -¿Qué edad tenía la primera vez que se encontró en esta situación?

- ☐ Menos de 13 años
- ☐ De 13 a 18 años

33 - Algun familiar, amigo de la familia, otra persona conocida o desconocida alguna vegada **consiguió tener** una relación sexual oral, anal o vaginal con usted, sin su consentimiento?

☐ No

☐ Sí —————> En cas afirmativo, responda a las preguntas 33.1, 33.2 i 33.3

33.1- ¿Qué relación tenía con esta persona?

- ☐ Desconocido
- ☐ Amigo o conocido
- ☐ Amigo o conocido de la familia
- ☐ Padre
- ☐ Padrastro o cuidador
- ☐ Abuelo
- ☐ Hermano
- ☐ Hermanastro
- ☐ Religioso
- ☐ Pareja
- ☐ Otros familiares
- ☐ Otros \_\_\_\_\_

33.2- ¿Cuánto tiempo duró esta situación?

- ☐ Una vez
- ☐ Menos de 1 año
- ☐ De 1 a 3 años
- ☐ Más de 3 años

33.3 -¿Qué edad tenía la primera vez que se encontró en esta situación?

- ☐ Menos de 13 años
- ☐ De 13 a 18 años



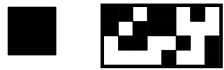

47205

Código encuesta

|  |  |  |
|--|--|--|
|  |  |  |
|--|--|--|

SI HA CONTESTADO SÍ A UNA O MÁS DE LAS PREGUNTAS 30, 31, 32 Y 33 CONTINUE POR LA PREGUNTA 34

SI HA CONTESTADO NO A LAS PREGUNTAS 30, 31, 32 Y 33 PASE A LA PREGUNTA 41

34 - ¿Se han repetido alguna de las situaciones descritas en las preguntas anteriores con más de una persona?

☐ Sí

☐ No

35 - Alguna o algunas de las situaciones descritas anteriormente ¿estuvieron acompañadas de agresión física?

☐ Nunca

☐ Alguna vez

☐ Casi siempre

☐ Siempre

36 - ¿Explicó los hechos a alguna persona en aquellos momentos?

☐ Sí

☐ No

37- Si es que sí, ¿a quién? (puede marcar más de una respuesta)

☐ Madre

☐ Padre

☐ Otros familiares

☐ Amigos/as

☐ Profesionales

☐ Policía, juez

☐ Otros \_\_\_\_\_

38 -¿Con qué reacciones se encontró? (puede marcar más de una respuesta)

☐ Fue ayudada y apoyada por alguien de la familia

☐ Fue ayudada por algún profesional

☐ Denunció los hechos legalmente

☐ Se pudo alejar del agresor

☐ La culpabilizaron de los hechos

☐ Otros \_\_\_\_\_

39 - ¿Cómo cree que le ha afectado haber sufrido abusos sexuales en su infancia?

|  |
|--|
|  |
|--|

40 - ¿Después de los 18 años, ha sufrido algunas de las situaciones de abuso sexual descritas anteriormente?

☐ Sí    ☐ No

41 - Por último, ¿desea hacer alguna sugerencia?

|  |
|--|
|  |
|--|

GRACIAS POR SU COLABORACIÓN
